# Supplementary material for: Restmaterialer fra bio-energiproduktion - kan de tilbageføres til marken?
Source: Royal Society of Chemistry journal article supplement (doi:10.1039/b901333d), 2010-03-01

## Supplementary data

### Evolution of the structures and stabilities of boron-doped lithium cluster cations: *ab initio* and DFT studies

Ying Li<sup>a)</sup>, Yong-Jun Liu<sup>b)</sup>, Di Wu<sup>a)</sup>,\* Zhi-Ru Li<sup>a)</sup>

*a)* State Key Laboratory of Theoretical and Computational Chemistry, Institute of Theoretical Chemistry, Jilin University, Changchun, 130023, China      Email: [wud@mail.jlu.edu.cn](mailto:wud@mail.jlu.edu.cn)

*b)* Lanzhou Petrochemical Research Center, Petrochina Petrochemical Research Institute, Lanzhou, China

**Figure S1.** Molecular orbitals (isovalue = 0.02 au) of  $\text{BeLi}_n$ ,  $\text{BLi}_n^+$  and  $\text{BLi}_n$  ( $n = 5-7$ ). The superscripts indicate spin multiplicity. The continuous lines represent doubly and singly occupied orbitals for close-shell and open-shell systems, respectively, the dotted lines correspond to unfilled states, the degenerate orbitals are arrayed parallel to each other, and the arrows indicate the  $\alpha$  (up) and  $\beta$  (down) spin states.

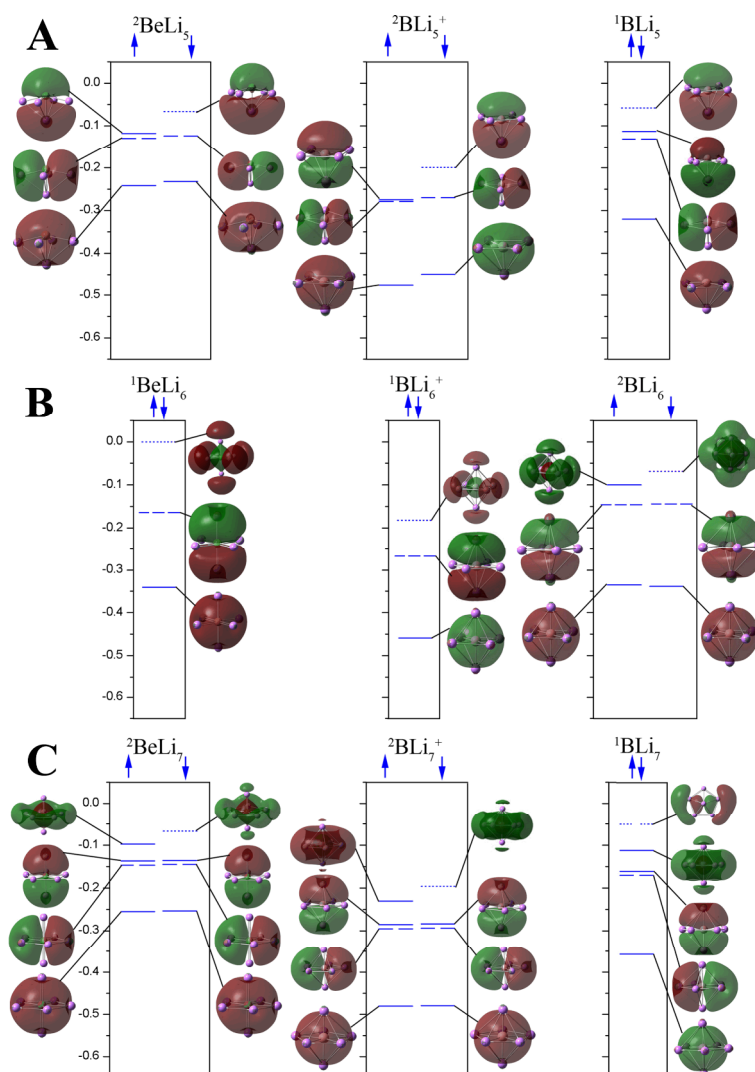

Supplement: b901333d.pdf [file b901333d.pdf]
